# Supplementary material for: Angiopoietin-like 2 is essential to aortic valve development in mice
Source: PubMed Central journal article supplement (PMC9681843; doi:10.1038/s42003-022-04243-6), 2022-11-21
Supplement: 42003_2022_4243_MOESM2_ESM.pdf [file 42003_2022_4243_MOESM2_ESM.pdf]

## Supplementary Material for Labbé et al.

**Table S1:** Echocardiographic data of *Angptl2*-KD mice and their age-matched WT littermates at 2 months and 3.5 months.

**Table S2:** Echocardiographic data of *Angptl2*-KD mice and their age-matched WT littermates at 7 months.

**Table S3:** Primer sequences used in quantitative RT-PCR.

**Table S4:** Overview of the primary/secondary antibodies.

**Supplementary Data 1:** Genes significantly regulated in human adult vs. Fetal aortic valves.

**Supplementary Data 2:** WGCNA turquoise gene module.

**Supplementary Data 3:** Pathway enrichment of the WGCNA turquoise gene module.

**Supplementary Data 4:** Source data for main Figures.

**Figure S1:** Expression profile of *Angptl2* RNA in Eurexpress.

**Figure S2:** ANGPTL2 expression in sub-cultured mouse VICs.

**Figure S3:** Specificity of ANGPTL2 staining of E14.5 and 2 month-old mice AoV.

**Figure S4:** Evaluation of the mitral valve function by echo in *Angptl2*-KD mice.

**Figure S5:** AVS is still present in 7-10-month old male *Angptl2*-KD mice.

**Figure S6:** Correlation between the severity of AVS and cardiac hypertrophy in *Angptl2*-KD mice.

**Figure S7:** Survival curve of *Angptl2*-KD mice.

**Figure S8:** Changes in gene expression in AoV leaflets from *Angptl2*-KD mice.

**Figure S9:** Increased black deposits observed in AoV leaflets from *Angptl2*-KD mice.

**Figure S10:** PirB and Integrin  $\alpha 5\beta 1$  expression in embryonic and adult mice AoV.

**Figure S11:** WGCNA analysis identified 17 heart valve genetic modules.

**Figure S12:** Unedited blots/gels for Figure S2.

**Table S1:** Echocardiographic data of *Angptl2*-KD mice and their age-matched WT littermates at 2 months and 3.5 months.

Data are means±SEM of 5 mice per group (or means±SEM of *n* mice indicated for each parameter); \*:< 0.05 versus age- and sex-matched WT mice; Mann-Whitney U tests were used. LV: left ventricular.

| <b>2 MONTHS</b>              |                                         | <b>Male WT (n=5)</b> | <b>Male KD (n=5)</b> |
|------------------------------|-----------------------------------------|----------------------|----------------------|
| <b>LV structure</b>          | LV mass (mg)                            | 102±5.07             | 129±16.0             |
|                              | Body weight (g)                         | 26.4±0.887           | 24.7±1.16            |
|                              | LV mass/body weight (mg/g)              | 3.84±0.134           | 5.15±0.491 p=0.056   |
|                              | LV anterior wall thickness (mm)         | 0.70±0.04            | 0.81±0.04 p=0.095    |
|                              | LV posterior wall thickness (mm)        | 0.62±0.03            | 0.75±0.05 p=0.095    |
| <b>LV systolic function</b>  | Ejection Fraction (%)                   | 56.9±3.74            | 54.2±4.42            |
|                              | Fractional shortening (%)               | 25.7±2.41            | 24.1±2.51            |
|                              | Cardiac output (mL/min)                 | 11.6±0.712           | 12.3±1.46            |
|                              | Stroke volume (µl)                      | 32.6±1.21            | 28.8±2.71            |
|                              | Septal contractility (cm/s)             | 2.09±0.138           | 2.01±0.129           |
|                              | Lateral contractility (cm/s)            | 1.76±0.124           | 1.76±0.0942          |
|                              | LV end-diastolic volume (µL)            | 193.4±10.23          | 194.2±23.04          |
|                              | LV end-systolic volume (µL)             | 83.8±9.66            | 91.6±18.3            |
| <b>LV diastolic function</b> | E/A ratio                               | 1.22±0.043 (n=5)     | 1.46±0.30 (n=2)      |
|                              | E/E' ratio                              | 31.0±2.56 (n=5)      | 38.7±5.26 (n=2)      |
|                              | E velocity (cm/s)                       | 63.7±1.44            | 90.7±4.18 **         |
|                              | A velocity (cm/s)                       | 52.3±1.69 (n=5)      | 63.6±12.2 (n=2)      |
|                              | E deceleration time (ms)                | 27.2±3.53            | 30.2±3.73            |
|                              | E deceleration rate (m/s <sup>2</sup> ) | 25.3±3.21            | 31.4±3.01            |
|                              | Iso volumetric relaxation time (ms)     | 15.8±1.99            | 11.5±1.34 p=0.0873   |

| 2 MONTHS              |                                         | Female WT (n=5) | Female KD (n=5)    |
|-----------------------|-----------------------------------------|-----------------|--------------------|
| LV structure          | LV mass (mg)                            | 77.6±5.62       | 83.7±6.19          |
|                       | Body weight (g)                         | 18.6±0.75       | 17.6±0.68          |
|                       | LV mass/body weight (mg/g)              | 4.15±0.17       | 4.76±0.32 p=0.095  |
|                       | LV anterior wall thickness (mm)         | 0.60±0.03       | 0.71±0.02 p=0.095  |
|                       | LV posterior wall thickness (mm)        | 0.54±0.02       | 0.58±0.04          |
| LV systolic function  | Ejection Fraction (%)                   | 53.4±1.56       | 66.9±4.66 *        |
|                       | Fractional shortening (%)               | 23.4±0.874      | 32.5±3.38 *        |
|                       | Cardiac output (mL/min)                 | 11.4±1.09       | 13.4±1.35          |
|                       | Stroke volume (µl)                      | 29.0±2.81       | 29.4±2.48          |
|                       | Septal contractility (cm/s)             | 1.99±0.15       | 1.83±0.09          |
|                       | Lateral contractility (cm/s)            | 1.83±0.16       | 1.80±0.08          |
|                       | LV end-diastolic volume (µL)            | 166.2±16.50     | 144.8±11.63        |
|                       | LV end-systolic volume (µL)             | 77.2±7.33       | 49.4±10.9 p=0.0952 |
| LV diastolic function | E/A ratio                               | 1.88±0.22 (n=5) | 1.42±0.056 (n=3)   |
|                       | E/E' ratio                              | 31.1±1.11 (n=5) | 34.9±2.23 (n=3)    |
|                       | E velocity (cm/s)                       | 69.9±6.26       | 81.9±2.57 p=0.095  |
|                       | A velocity (cm/s)                       | 39.2±5.50 (n=5) | 58.6±1.06 * (n=3)  |
|                       | E deceleration time (ms)                | 27.1±1.50       | 32.1±1.56 p=0.056  |
|                       | E deceleration rate (m/s <sup>2</sup> ) | 26.2±2.52       | 25.9±1.80          |
|                       | Iso volumetric relaxation time (ms)     | 10.1±1.16       | 5.44±1.22 p=0.0556 |

| 3.5 MONTHS   |                                  | Male WT (n=5) | Male KD (n=5) |
|--------------|----------------------------------|---------------|---------------|
| LV structure | LV mass (mg)                     | 113±7.17      | 128±14.2      |
|              | Body weight (g)                  | 30.8±1.66     | 24.5±1.94 *   |
|              | LV mass/body weight (mg/g)       | 3.65±0.0620   | 4.90±0.359 *  |
|              | LV anterior wall thickness (mm)  | 0.76±0.04     | 0.79±0.04     |
|              | LV posterior wall thickness (mm) | 0.64±0.03     | 0.76±0.02 *   |

|                              |                                         |                 |                          |
|------------------------------|-----------------------------------------|-----------------|--------------------------|
| <b>LV systolic function</b>  | Ejection Fraction (%)                   | 51.2±2.81       | 58.4±4.11                |
|                              | Fractional shortening (%)               | 22.3±1.57       | 26.7±2.52                |
|                              | Cardiac output (mL/min)                 | 12.7±1.22       | 11.7±1.06                |
|                              | Stroke volume (μl)                      | 29.2±2.13       | 24.0±1.38 p=0.087        |
|                              | Septal contractility (cm/s)             | 2.13±0.0301     | 2.26±0.104               |
|                              | Lateral contractility (cm/s)            | 2.03±0.0760     | 2.20±0.117               |
|                              | LV end-diastolic volume (μL)            | 198.2±8.327     | 201.4±28.58              |
|                              | LV end-systolic volume (μL)             | 97.4±8.55       | 88.0±19.0                |
| <b>LV diastolic function</b> | E/A ratio                               | 1.43±0.14 (n=4) | 1.25±0.095 (n=3)         |
|                              | E/E' ratio                              | 30.0±2.21 (n=4) | 35.8±5.76 (n=3)          |
|                              | E velocity (cm/s)                       | 69.3±5.57       | 94.6±7.96 *              |
|                              | A velocity (cm/s)                       | 46.2±4.16 (n=4) | 66.6±5.43 p=0.0571 (n=3) |
|                              | E deceleration time (ms)                | 27.1±2.11       | 25.3±1.65                |
|                              | E deceleration rate (m/s <sup>2</sup> ) | 26.1±1.90       | 37.5±1.98 **             |
|                              | Iso volumetric relaxation time (ms)     | 6.76±1.28       | 6.31±0.901               |

**Table S2:** Echocardiographic data of male *Angptl2*-KD mice and their age-matched WT littermates at 7 months.

Data are means±SEM of n=13 WT mice and n=14 *Angptl2*-KD mice (or means±SEM of n mice indicated for each parameter); \*:< 0.05 versus age- and sex-matched WT mice determined with t-test or Mann-Whitney U test according to the normality of distribution. LV: left ventricular.

| 7 MONTHS              |                                     | WT (n=13)        | KD (n=14)        | p value           |
|-----------------------|-------------------------------------|------------------|------------------|-------------------|
| LV structure          | LV mass (mg)                        | 117.7±5.962      | 123.7±11.31      | 0.6509            |
|                       | Body weight (g)                     | 35.2±1.64        | 29.1±1.13        | <b>0.0053 **</b>  |
|                       | LV mass/body weight (mg/g)          | 3.41±0.203       | 4.17±0.261       | <b>0.0222 *</b>   |
|                       | LV anterior wall thickness (mm)     | 0.82±0.027       | 0.83±0.041       | 0.7291            |
|                       | LV posterior wall thickness (mm)    | 0.75±0.015       | 0.75±0.034       | 0.9333            |
| LV systolic function  | Heart rate (bpm)                    | 460±10(n=9)      | 455±15 (n=9)     | 0.3736            |
|                       | Ejection Fraction (%)               | 74.6±1.67        | 66.4±3.09        | <b>0.0316 *</b>   |
|                       | Fractional shortening (%)           | 38.2±1.39        | 32.7±2.36        | <b>0.0583</b>     |
|                       | Cardiac output (mL/min)             | 11.5±0.41        | 12.0±0.37        | 0.4481            |
|                       | Stroke volume (mL)                  | 0.027±0.001      | 0.028±0.001      | 0.6673            |
|                       | Lateral contractility (cm/s)        | 2.40±0.09        | 1.87±0.08        | <b>0.0002 ***</b> |
|                       | Septal contractility (cm/s)         | 2.55±0.09        | 2.18±0.08        | <b>0.0053 **</b>  |
|                       | LV end-diastolic volume (µL)        | 166.2±9.923      | 185.0±21.97      | 0.3560            |
|                       | LV end-systolic volume (µL)         | 42.5±4.30        | 68.4±12.7        | 0.1654            |
| LV diastolic function | E/A ratio                           | 1.48±0.04 (n=9)  | 1.53±0.08 (n=5)  | 0.4970            |
|                       | E/E' ratio                          | 26.2±2.23 (n=10) | 43.4±4.12 (n=5)  | <b>0.0080 **</b>  |
|                       | E velocity (cm/s)                   | 84.9±2.38 (n=13) | 95.2±5.20 (n=13) | 0.0828            |
|                       | A velocity (cm/s)                   | 56.1±1.30 (n=9)  | 53.7±3.05 (n=5)  | 0.3636            |
|                       | Deceleration time (ms)              | 33.2±1.83 (n=13) | 35.0±2.09 (n=13) | 0.5195            |
|                       | Iso volumetric relaxation time (ms) | 7.01±0.66 (n=12) | 6.69±0.25 (n=13) | 0.7163            |

|                               |                                        |                  |                  |                  |
|-------------------------------|----------------------------------------|------------------|------------------|------------------|
| <b>Myocardial performance</b> | Myocardial performance index (global)  | 43.2±3.01 (n=13) | 54.0±2.02 (n=13) | <b>0.0067 **</b> |
|                               | Myocardial performance index (lateral) | 63.0±3.65        | 71.1±3.11        | 0.1016           |
|                               | Myocardial performance index (septal)  | 58.4±3.77        | 68.1±3.05        | 0.0554           |

**Table S3:** Primer sequences used in quantitative RT-PCR.

| Target gene    | GenBank Accession (mRNA sequence) | Forward                | Reverse                | Expected size of amplicon (bp) | Annealing temperature (°C) |
|----------------|-----------------------------------|------------------------|------------------------|--------------------------------|----------------------------|
| Angptl2        | NM_011923                         | GATCCAGAGTGACCAGAATC   | TCTCAGGCTTCACCAGGTAG   | 170                            | 55                         |
| Col1a1         | NM_007742                         | TGGTGCCAAGGGTCTCACTG   | AGGGCGACCATCTTGACCAG   | 91                             | 62                         |
| Col3a1         | NM_009930                         | CGGGTGCTCCTGGACAGAAT   | GTCCAGAAGTCCAGTGGGT    | 114                            | 62                         |
| Mmp2           | NM_008610                         | AGGGCACCTCCTACAACAGC   | CATAGCGGTCTCGGGACAGAA  | 119                            | 61                         |
| Bmp2           | NM_007553                         | CAAACACAAACAGCGGAAGC   | GTGCCACGATCCAGTCATTC   | 98                             | 57                         |
| Bmp4           | NM_007554                         | GCCCGGAAGCTAGGTGAGTT   | CCATCAGGGACGGAGACCAG   | 102                            | 61                         |
| Notch1         | NM_008714                         | TGGATGACCTAGGCAAGTCG   | TTCTGCATGTCCTTGTTGGC   | 103                            | 58                         |
| Hes1           | NM_008235                         | ACACCGGACAAACCAAAGAC   | AATGCCGGGAGCTATCTTTC   | 148                            | 57                         |
| Hey1           | NM_010423                         | CACCTGAAAATGCTGCACAC   | ATGCTCAGATAACGGGCAAC   | 122                            | 57                         |
| Hey2           | NM_013904                         | ACAAGGATCTGCCAAGTTAG   | CAATGCTCATGAAGTCTGTG   | 131                            | 53                         |
| Spp1           | NM_001204201                      | CTGTTTGGCATTGCCTCCTC   | GTGCAGGCTGTAAAGCTTCTT  | 81                             | 59                         |
| Alp1           | NM_007431                         | GTTGCCAAGCTGGGAAGAACAC | CCCACCCCGCTATTCCAAAC   | 121                            | 61                         |
| Dcn            | NM_001190451                      | TTCCTACTCGGCTGTGAGTC   | AAGTTGAATGGCAGAACGC    | 100                            | 56                         |
| Vcan           | NM_001081249                      | CATCGACGCACATGGGATGC   | CATGGCCCACACGATTCACA   | 109                            | 60                         |
| Eln            | NM_007925                         | GTCCCAGGTGGTGTGGAGT    | CCACAGCACCTGTGCGAGACT  | 118                            | 61                         |
| Ctnnb1         | NM_007614                         | GCGTGGACAATGGCTACTCAAG | TATTAACTACCACCTGGTCCTC | 517                            | 58                         |
| Axin2          | NM_015732                         | CCTGTGGAACCTGCTGCCTT   | TCATCCTCCC GGATCTGCTG  | 116                            | 61                         |
| NF- $\kappa$ B | NM_008689                         | CACGGATGACAGAGGCGTGTA  | AGGCTCCAGTCTCCGAGTGAA  | 236                            | 64                         |
| Sox9           | NM_011448                         | TTCAGATGCAGTGAGGAGCA   | CTTGCAGAGGCATGTGTTGT   | 124                            | 57                         |
| TGF- $\beta$ 1 | NM_011577                         | GCTAATGGTGGACCGCAACAAC | CACTGCTTCCCGAATGTCTGAC | 100                            | 63                         |
| Nppa           | NM_008725                         | GGTAGGATTGACAGGATTGGAG | GACACACCACAAGGGCTTAG   | 138                            | 58                         |
| Nppb           | NM_008726                         | AGGCGAGACAAGGGAGAACA   | GGAGATCCATGCCGCAGA     | 63                             | 59                         |
| Myh7           | NM_080728                         | CGGACCTTGGAAGACCAGAT   | GACAGCTCCCCATTCTCTGT   | 116                            | 59                         |
| Cyclophilin A  | NM_008907                         | CCGATGACGAGCCCTTGG     | GCCGCCAGTGCCATTATG     | 191                            | 58                         |

**Table S4:** Overview of the primary/secondary antibodies.

| <b>Antibody</b>               | <b>Species</b> | <b>Dilution</b> | <b>Company (catalogue number)</b> |
|-------------------------------|----------------|-----------------|-----------------------------------|
| Angptl2                       | Goat           | 1:50            | R&D Systems (AF1444)              |
| CD31                          | Rabbit         | 1:100           | Abcam (ab28364)                   |
| CD31                          | Rat            | 1:100           | R&D Systems (AF3628)              |
| p21                           | Rabbit         | 1:100           | Abcam (ab188224)                  |
| Ki67                          | Rabbit         | 1:200           | Abcam (ab15580)                   |
| Vimentin                      | Rabbit         | 1:200           | Vector Laboratories (VP-V683)     |
| $\alpha$ -SMA                 | Mouse          | 1:100           | Sigma-Aldrich (A5228)             |
| Activated-Notch1              | Rabbit         | 1:100           | Abcam (ab8925)                    |
| Notch1                        | Rabbit         | 1:100           | Abcam (ab52627)                   |
| Notch1                        | Rabbit         | 1:100           | Cell Signaling (3608S)            |
| Integrin $\alpha$ 5 $\beta$ 1 | Rat            | 1:100           | Sigma-Aldrich (MAB2514)           |
| PirB                          | Rabbit         | 1:100           | Abcam (ab284407)                  |
| Alexa fluor-647               | Rabbit         | 1:500           | ThermoFisher (A31573)             |
| Alexa fluor-555               | Mouse          | 1:500           | ThermoFisher (A31570)             |
| Alexa fluor-555               | Goat           | 1:500           | ThermoFisher (A21432)             |
| Alexa fluor-488               | Rat            | 1:500           | ThermoFisher (A21208)             |



**Figure S1**

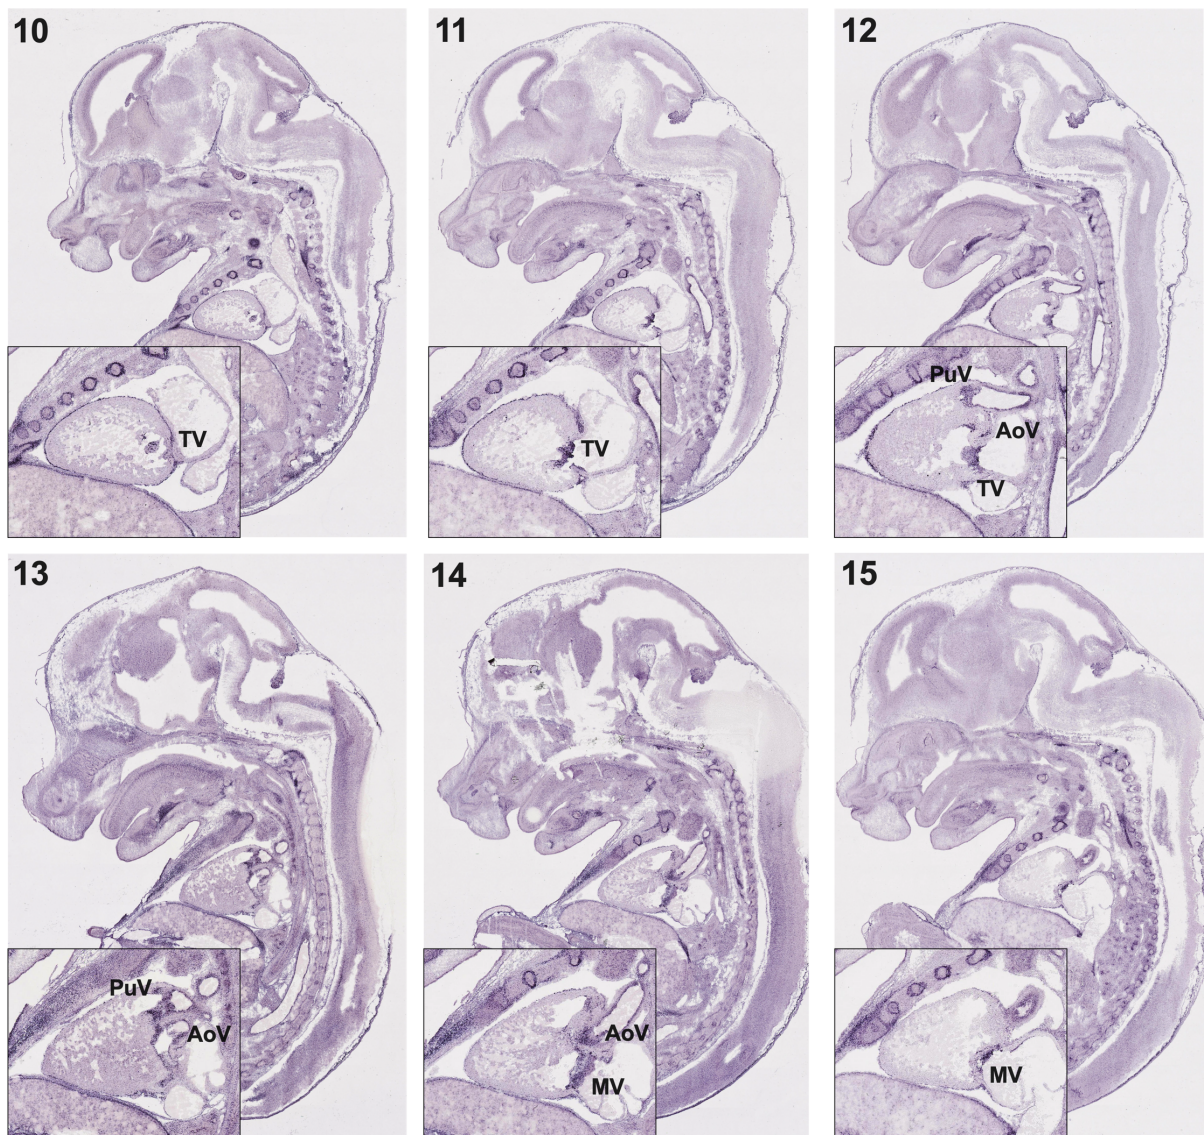

**Figure S1: Expression profile of *Angptl2* RNA in Eurexpress.**

*In situ* hybridizations on whole sagittal sections and their corresponding higher magnifications of the heart region (in the bottom left corner of the image) of wild-type mice embryos at E14.5 from the public database Eurexpress show a strong expression of *Angptl2* RNA in the four valves of the developing heart. Number in the top left corner of each image represents image number from Eurexpress: euxassay\_007716. TV: tricuspid valve, PuV: pulmonary valve, AoV: aortic valve, MV: mitral valve.

**Figure S2**

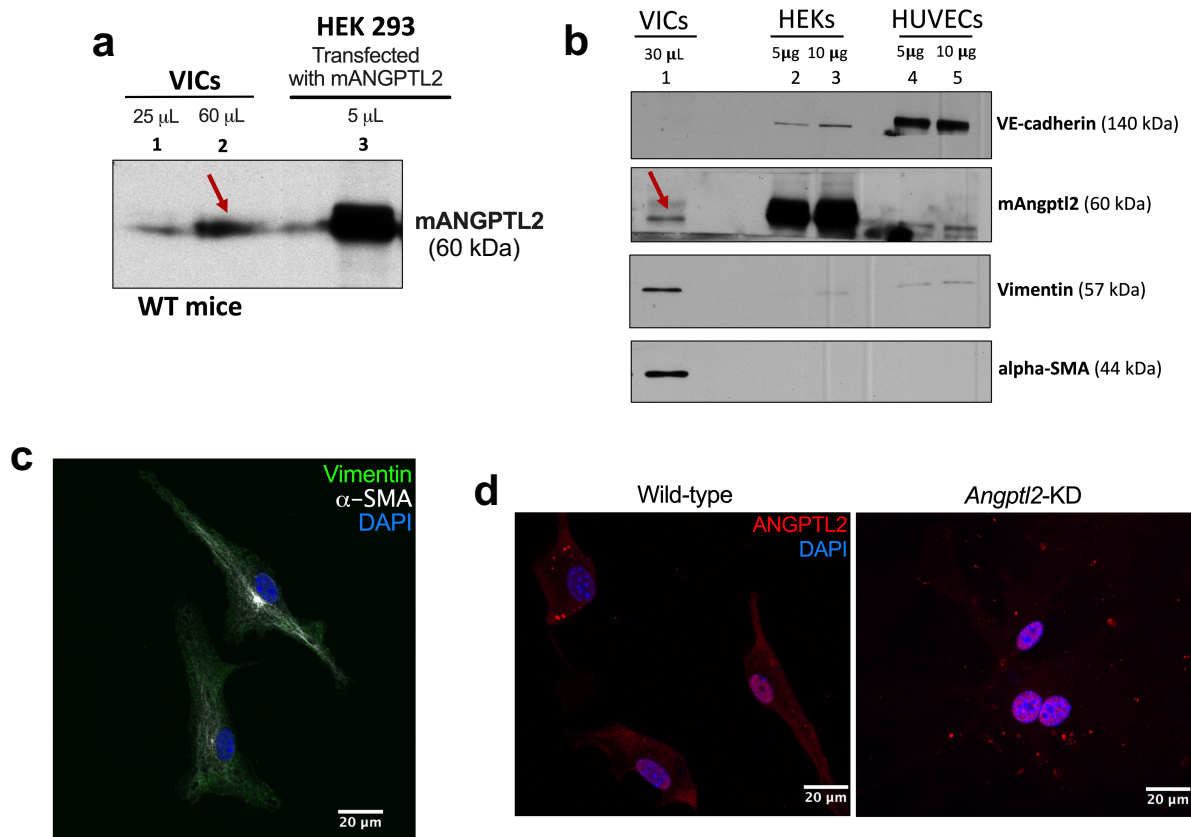

**Figure S2: ANGPTL2 expression in sub-cultured mouse VICs.**

(a) ANGPTL2 protein expression by Western Blot in VICs sub-cultured from AoV leaflets of WT mice (lines 1-2; indicated by a red arrow) compared to a positive control, *i.e.*, HEK293 cells transfected with a plasmid encoding the murine form of ANGPTL2 (line 3). (b) VE-cadherin, ANGPTL2, Vimentin and  $\alpha$ -SMA expression by Western Blot in VICs from WT mice (line 1) compared to a positive control for Angptl2 expression, *i.e.*, HEK293 cells transfected with a plasmid encoding the murine form of Angptl2 (lines 2-3) and a positive control for endothelial markers, *i.e.*, HUVECs (lines 4-5). In addition to Angptl2, VICs expressed markers of (myo)fibroblasts such as vimentin and  $\alpha$ -SMA (line 1). (c) Vimentin and  $\alpha$ -SMA expression was also confirmed by immunofluorescence in VICs from WT mice. (d) Representative ANGPTL2 immunofluorescence in VICs from WT and *Angptl2*-KD mice. A cytoplasmic ANGPTL2 signal is only observed in WT VICs, but not in the negative control, *i.e.*, VICs from *Angptl2*-KD mice; Of note, the nuclear red-ANGPTL2 staining observed in cultured VICs from WT and *Angptl2*-KD mice was a non-specific signal. All images are representative of 3 independent experiments.

Figure S3

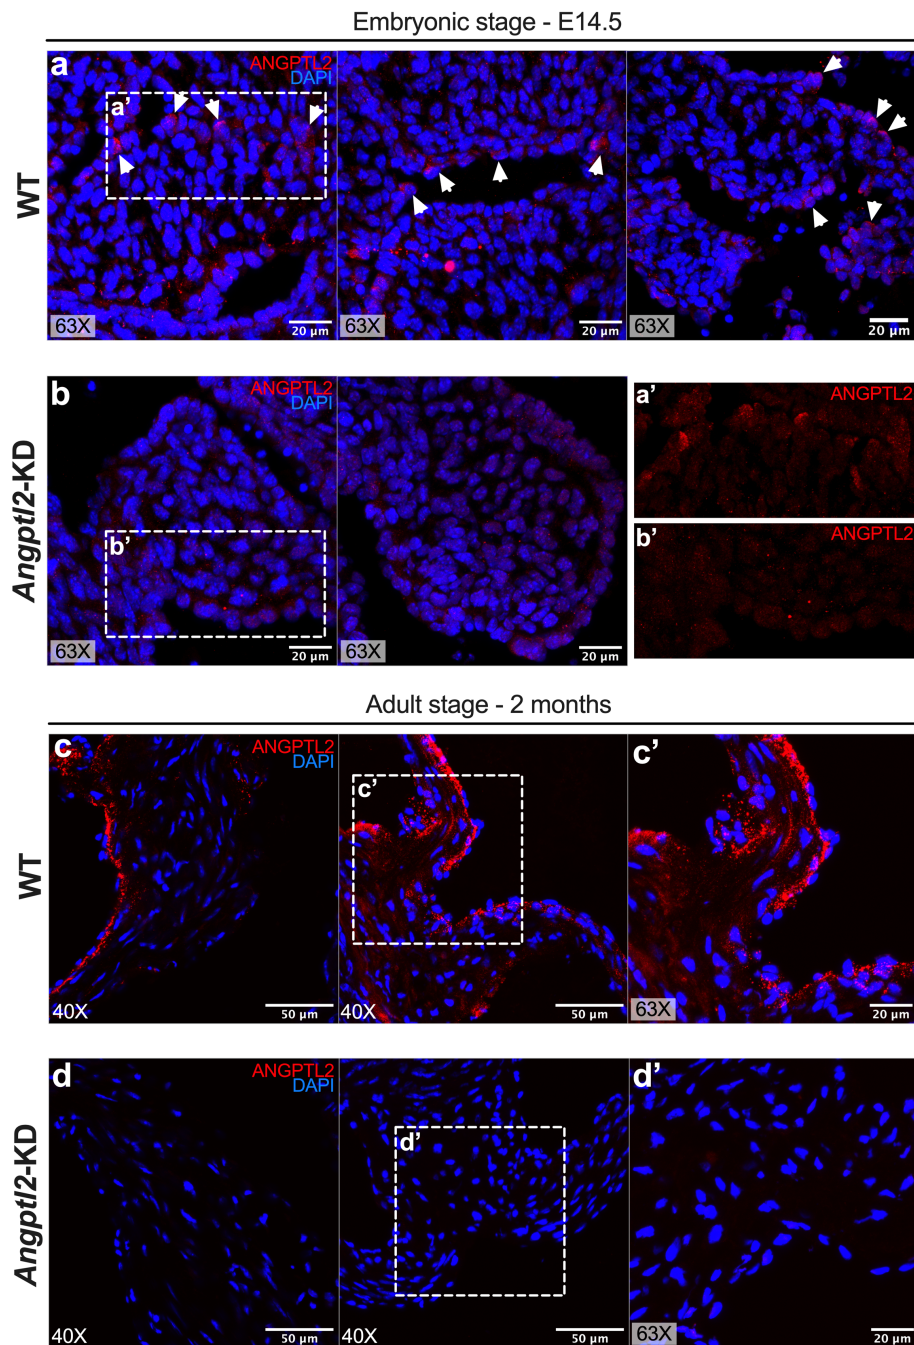

Figure S3: Specificity of ANGPTL2 staining of E14.5 and 2 month-old mice AoV.

(a) Representative ANGPTL2 protein expression by immunofluorescence in AoV sections at E14.5 from WT mice. White arrows show the specific expression of ANGPTL2 in the cytoplasm of valve cells at the border of the leaflet; Image for ANGPTL2 expression is shown without DAPI staining in (a'). (b) The specificity of ANGPTL2 antibody was tested on AoV sections from *Angptl2*-KD mice at E14.5, which provided a systematic, non-specific signal in the nucleus, which was noticeable depending on the experiments; Image for ANGPTL2 expression is shown without DAPI staining in (b'). (c) Representative ANGPTL2 protein expression by immunofluorescence in AoV sections from 2-month old WT mice; Higher magnification (X63) is shown in (c'). (d) Representative ANGPTL2 protein expression by immunofluorescence in AoV sections from 2-month old *Angptl2*-KD mice; Higher magnification (X63) is shown in (d'). All images are representative of 3 independent experiments.

Figure S4

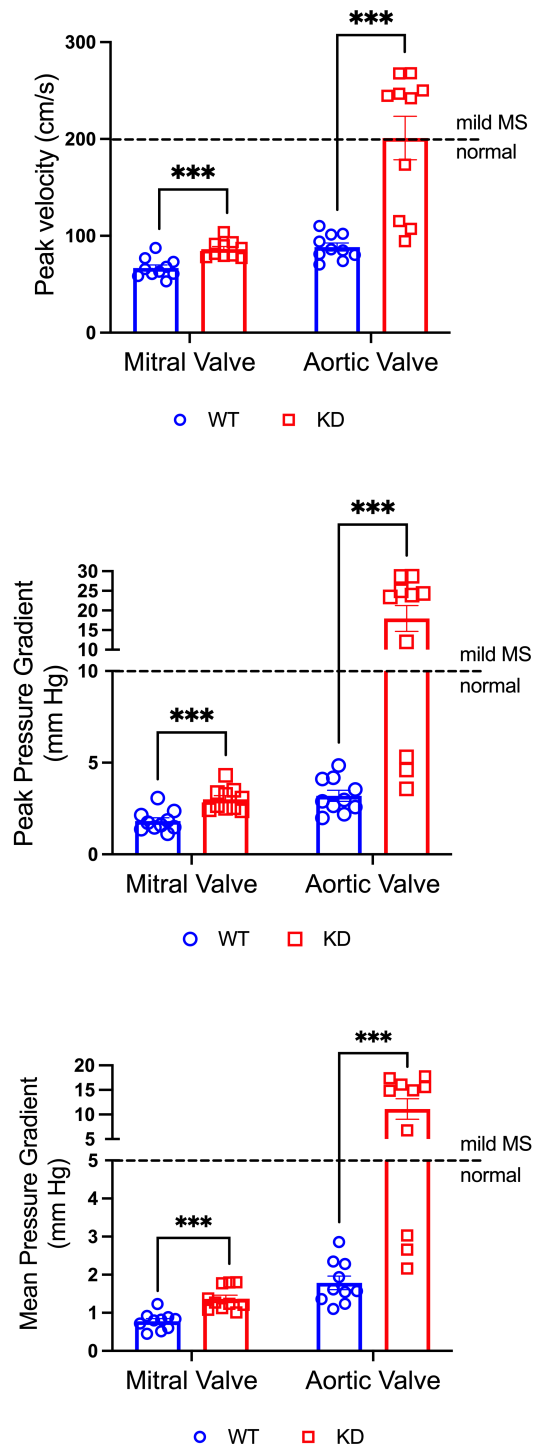

Figure S4: Evaluation of the mitral valve function by echo in *Angptl2*-KD mice.

Echocardiographic measurements of the peak velocity ( $V_{max}$ ), the peak and the mean pressure gradient of the mitral valve, and comparison with the parameters for aortic valve in male ( $n=5$ ) and female ( $n=5$ ) *Angptl2*-KD mice and WT littermates at 2 month-old ( $n=10$  mice *per* genotype). Data are means $\pm$ SEM of  $n$  mice. \*:  $p < 0.05$  determined with Mann-Whitney U test.

Figure S5

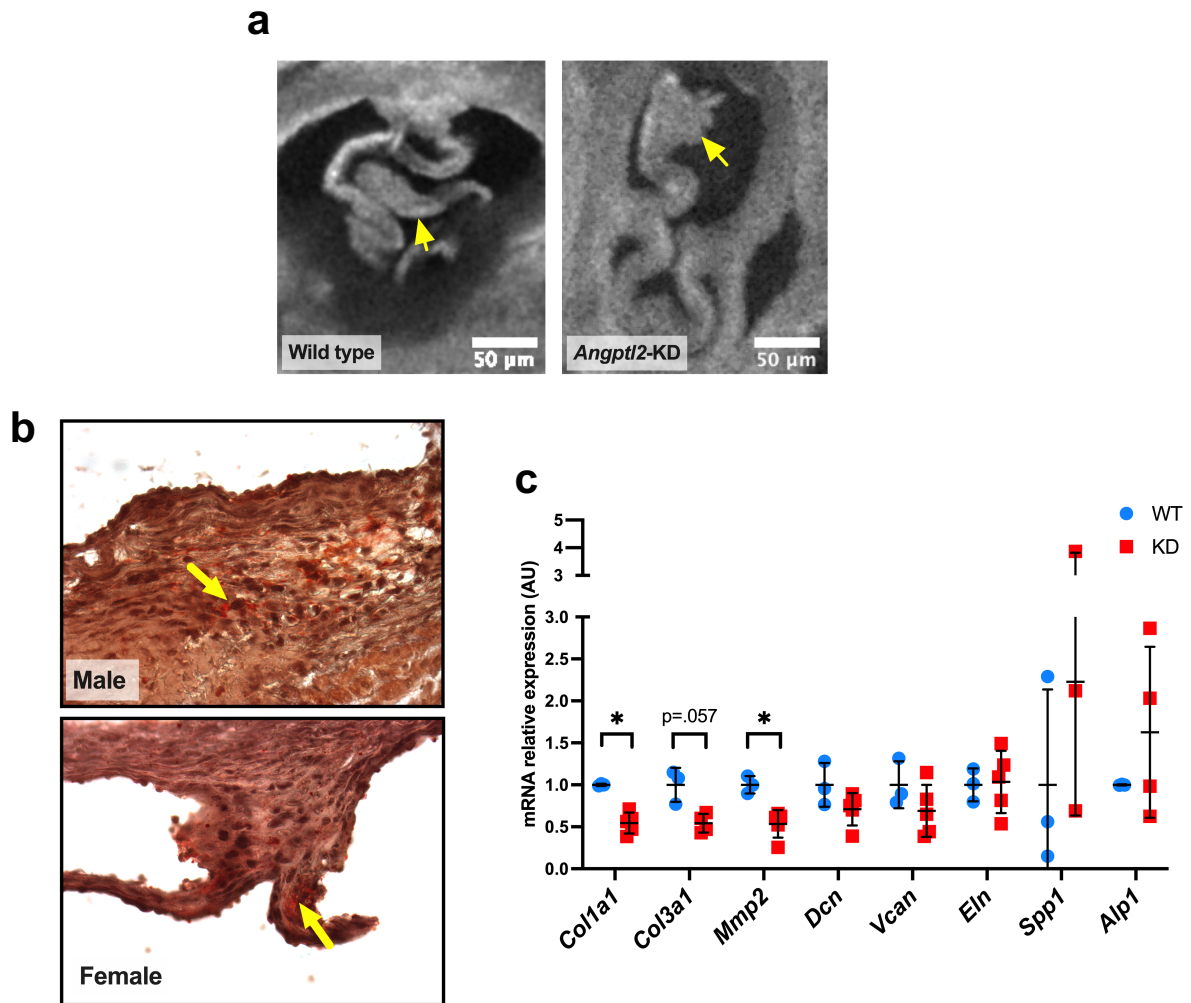

Figure S5 : AVS is still present in 7-10 month-old male *Angptl2*-KD mice.

(a) Optical coherence tomography (OCT) imaging of AoV from histological sections of 7-month old WT and *Angptl2*-KD mice. Leaflet thickening in *Angptl2*-KD mice compared with WT mice is indicated by yellow arrows. Images are representative of n=3 independent experiments. (b) Representative AoV sections (of n=3 independent experiments) from 7-month old male and female *Angptl2*-KD mice stained using alizarin red. Yellow arrows indicate calcium deposition (in red). (c) Gene expression by quantitative RT-qPCR in aortic valve leaflets from 10-month old male *Angptl2*-KD mice compared to their WT littermates, data are means±SEM of n=3 WT mice and n=3-5 *Angptl2*-KD mice. \*: p<0.05 determined with Mann-Whitney U test.

**Figure S6**

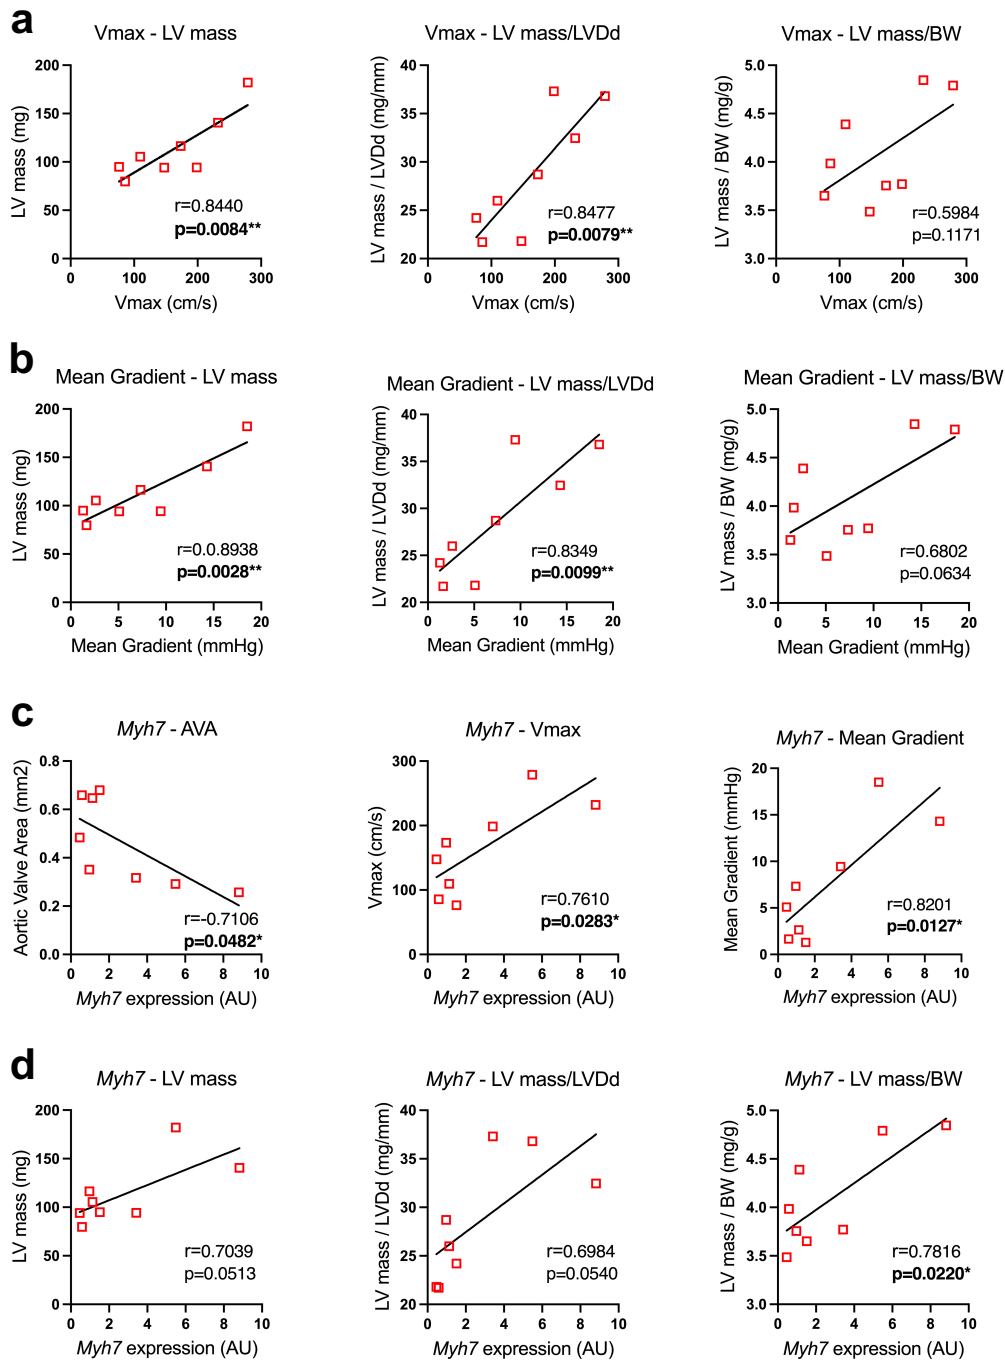

**Figure S6: Correlation between the severity of AVS and cardiac hypertrophy in *Angptl2*-KD mice.**

(a) Linear correlations between left ventricle (LV) mass, LV mass/LV dimension at end cardiac diastole (LVDd) ratio and LV mass/body weight (BW) ratio and the maximal velocity of AoV (Vmax). (b) Linear correlations between LV mass, LV mass/LVDd ratio and LV mass/BW ratio and the mean pressure gradient of the AoV. (c) Linear correlations between the AoV area (AVA), the Vmax and the mean gradient and *Myh7* mRNA levels in AoV leaflets. (d) Linear correlations between LV mass, LV mass/LVDd ratio and LV mass/BW ratio and *Myh7* mRNA levels in AoV leaflets. Data are means $\pm$ SEM of n=8 mice (5 male and 3 female *Angptl2*-KD mice). \*:  $p<0.05$  determined with Spearman correlation tests.

Figure S7

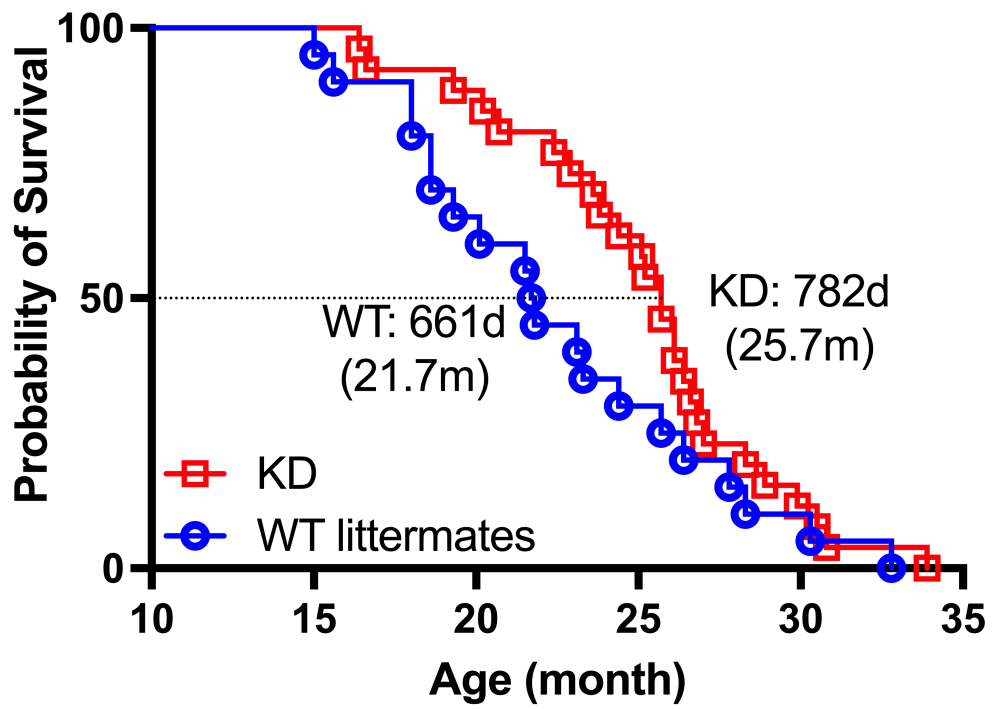

Figure S7: Survival curve of *Angptl2*-KD mice.

Evaluation of the lifespan of male *Angptl2*-KD mice (median survival age: 25.7 months; n=25) compared to WT littermates (median survival age: 21.7 months; n=19).

Figure S8

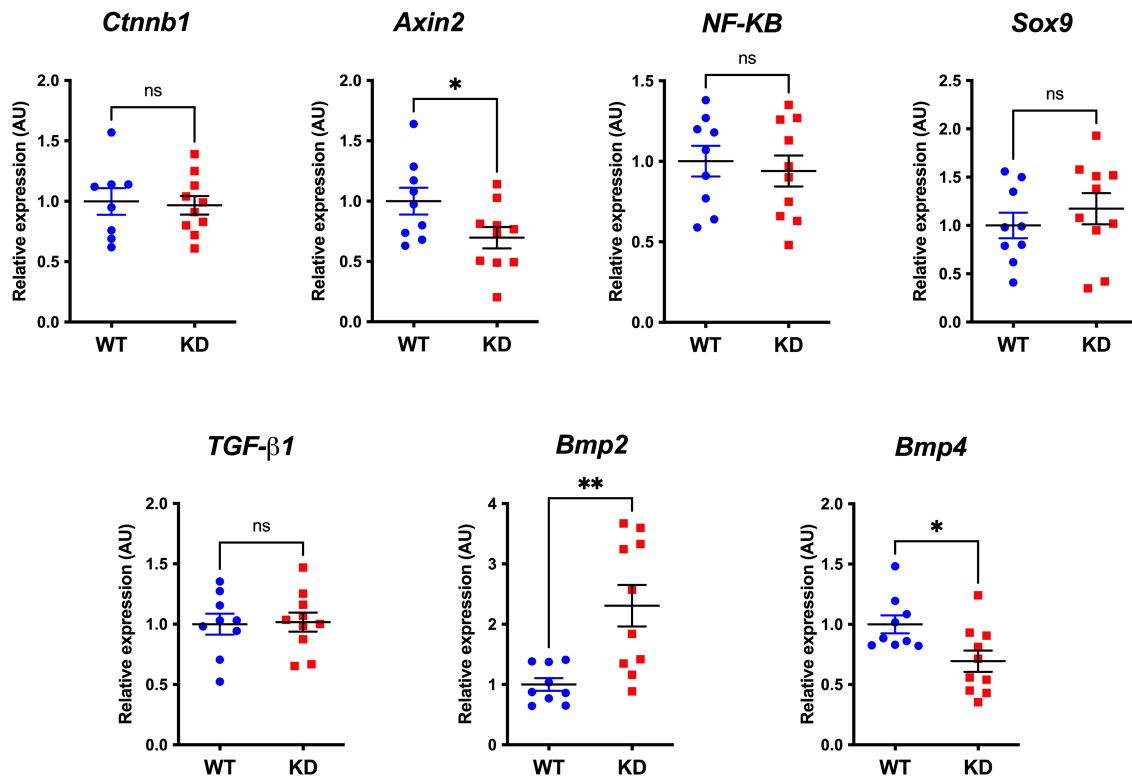

Figure S8: Changes in gene expression in AoV leaflets from *Angptl2*-KD mice.

Gene expression by quantitative RT-qPCR in aortic valve leaflets from 4-month old males and females *Angptl2*-KD compared to their WT littermates. Data are means±SEM of n=8-9 WT mice and n=10 *Angptl2*-KD mice. Males (n=4-5) and females (n=4-5) are pooled. \*: p<0.05 determined with t-test or Mann-Whitney U test according to the normality of distribution.



**Figure S9**

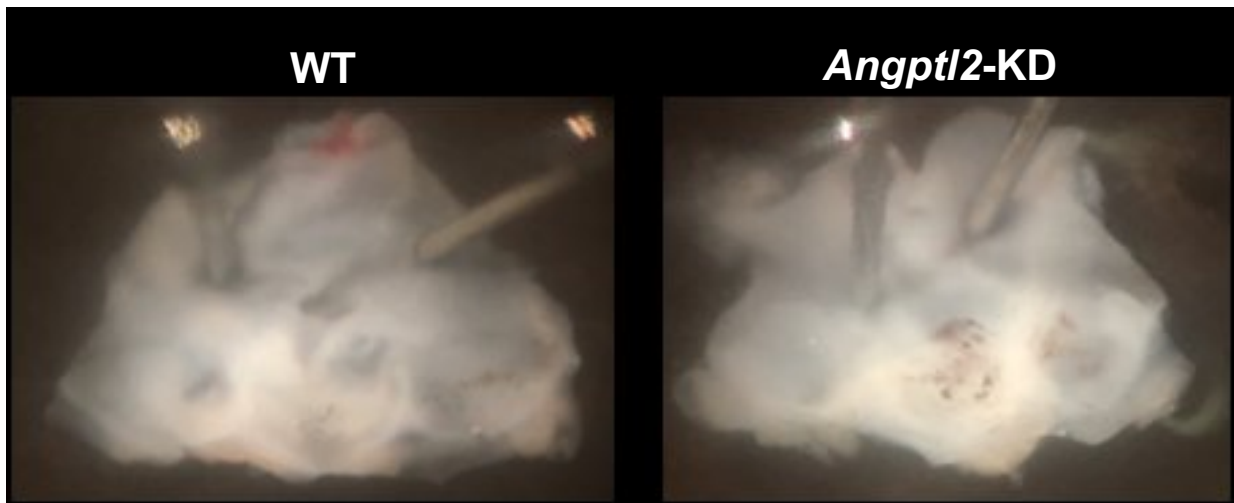

**Figure S9: Increased black deposits observed in AoV leaflets from *Angptl2*-KD mice.**

Representative images (of n=3 independent experiments) of whole mount preparations of AoV leaflets from 2-month old *Angptl2*-KD mice show increased black deposits – that could be melanin, as reported in the literature in *Axin2*-KO mice – compared to age-matched WT mice.

Figure S10

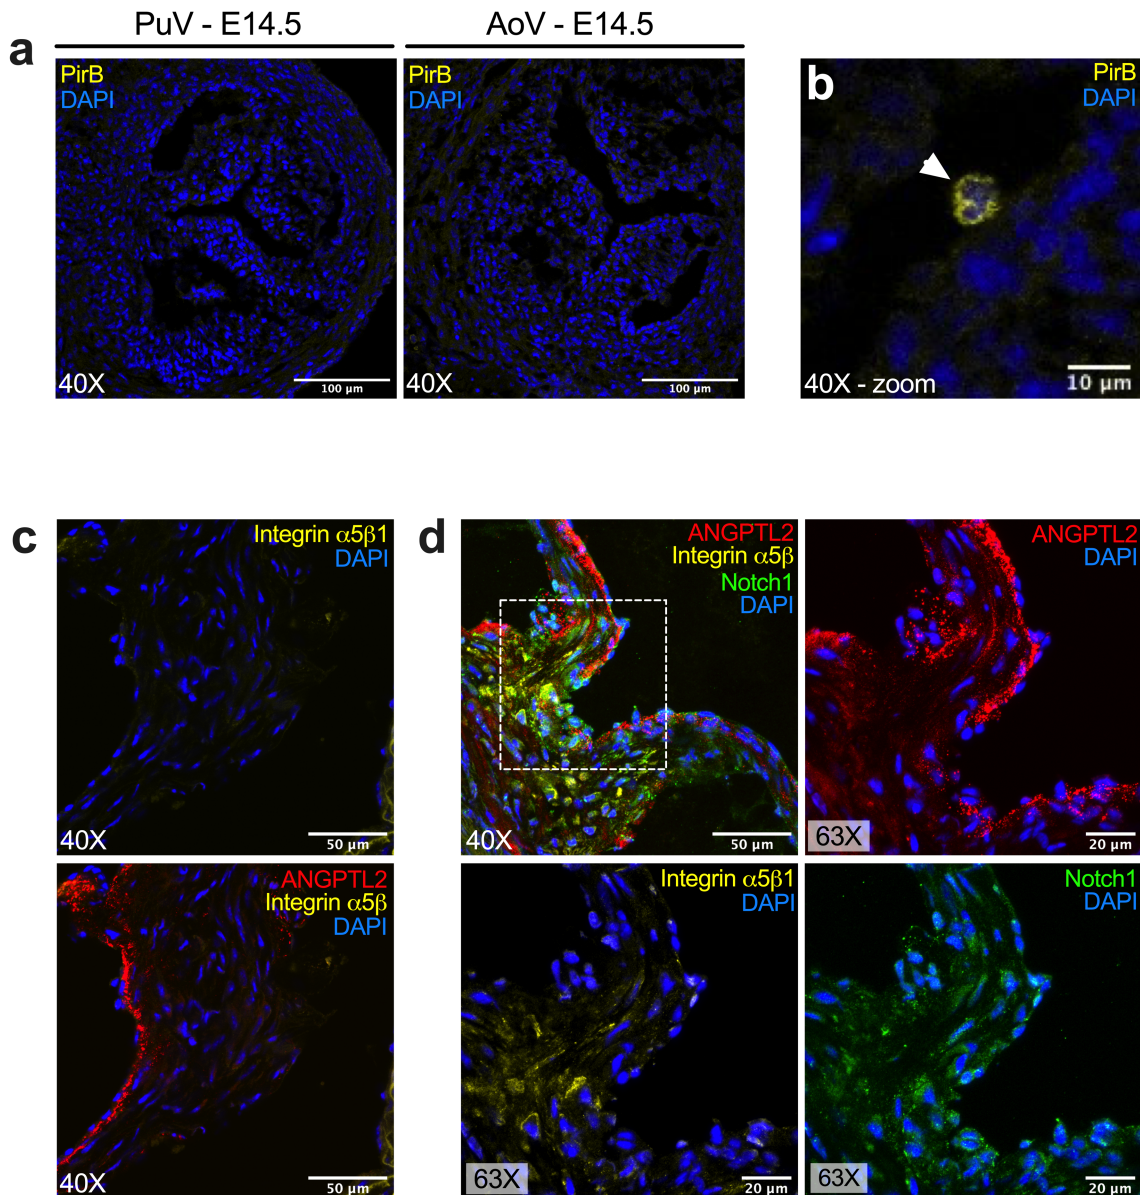

Figure S10: PirB and Integrin  $\alpha5\beta1$  expression in embryonic and adult WT mice AoV.

(a) Representative PirB protein expression by immunofluorescence in PuV and AoV sections from E14.5 WT embryo; PirB is not detected in valve leaflets at that age. (b) PirB was only detected in some polylobed nucleus, characteristics of neutrophils, scattered across the valve leaflets (indicated with a white arrowhead). (c) Representative Integrin  $\alpha5\beta1$  and ANGPTL2 protein expression by immunofluorescence in AoV leaflet from 2-month old WT mice. (d) Representative Integrin  $\alpha5\beta1$ , ANGPTL2 and Notch1 protein expression by immunofluorescence in AoV pillar from 2-month old WT mice. All images are representative of 3 independent experiments.

Figure S11

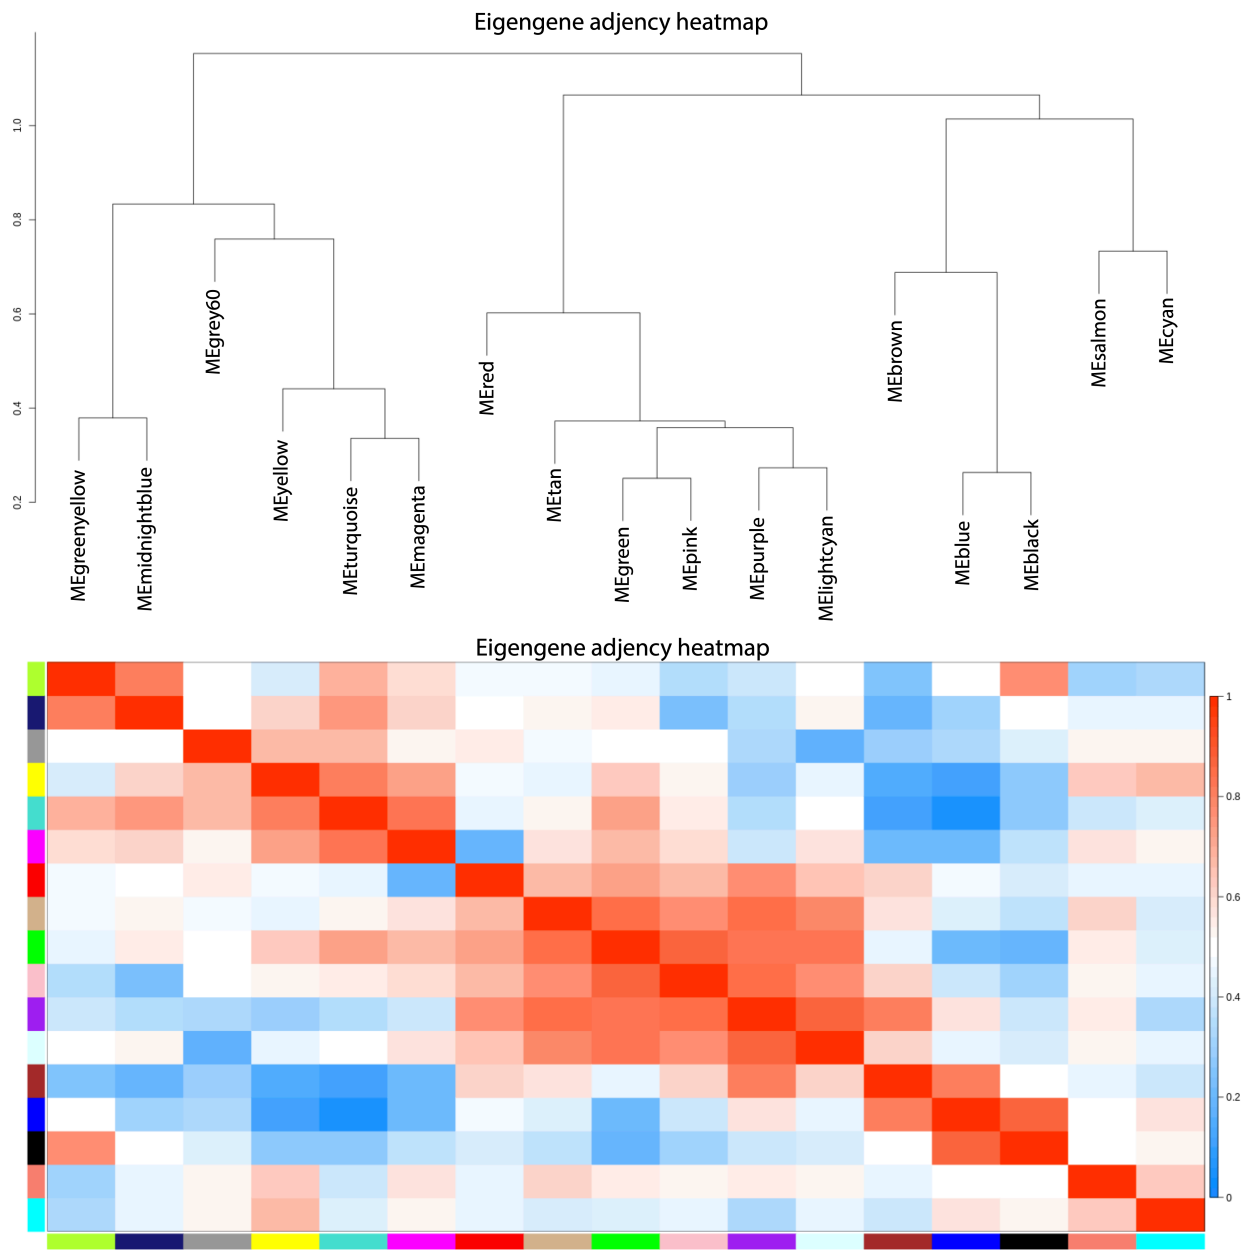

Figure S11: WGCNA analysis identified 17 heart valve genetic modules.

Figure S12

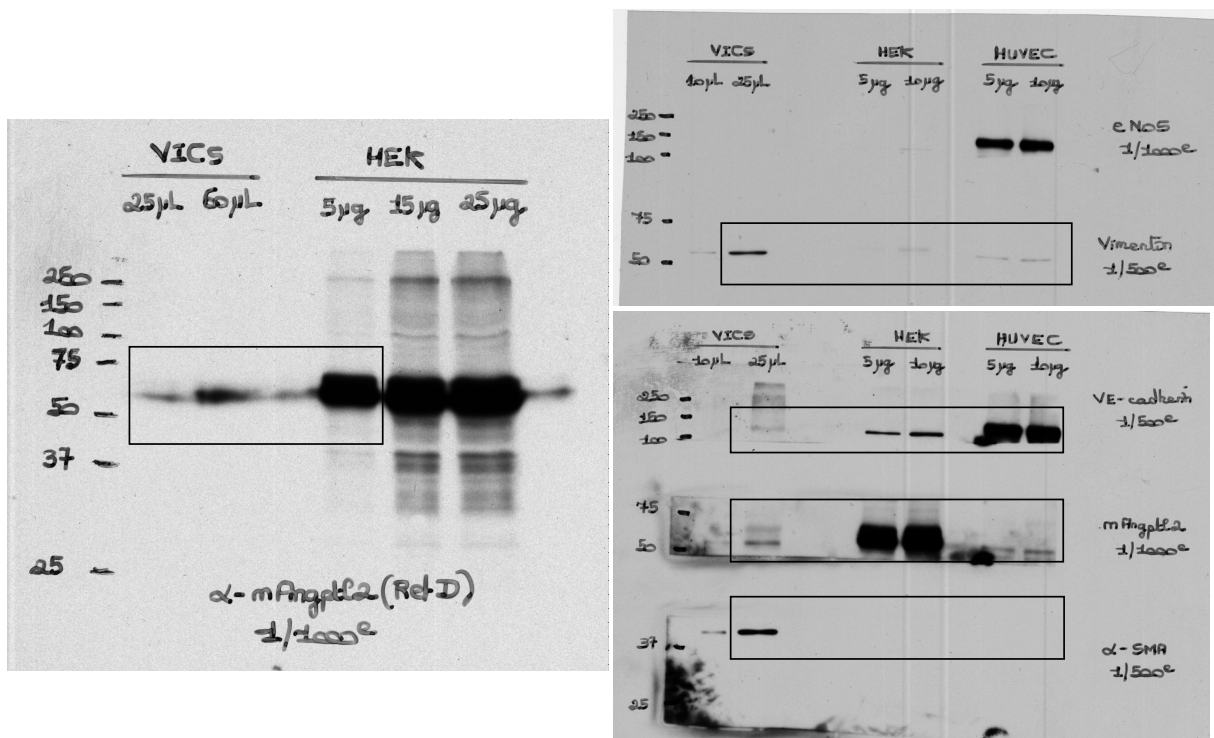

Figure S12: Unedited blots/gels for Figure S2.

## Supplementary Methods

*OCT Imaging* Each valve was embedded in 4% agarose cylindrical blocks for serial imaging. An in-house automated high-throughput histology setup combined with a swept-source optical coherence tomography (SS- OCT) microscope was used to image the agarose embedded valves. The SS-OCT system was reported previously (1). The swept-source laser was operated at a central wavelength of 1310 nm with a tuning bandwidth of 100 nm (Axsun, 1310 Swept Source Engine). A cropped Blackman apodization function was used to reduce the side lobes caused by the rectangular shape of the swept-source spectrum. A 3× microscope objective (Thorlabs, LSM04 Scan Lens) was enclosed in a 3-D printed watertight immersion chamber ending with a glass coverslip to protect the scanning lens from water. The system resolutions in water were 8 μm laterally and 10 μm axially. Its sensitivity was 98.5 dB, and its sensitivity roll-off along depth was  $-0.01 \text{ dB}/\mu\text{m}$ .

Images were acquired sequentially along x/y by moving a XY stage. At each motor position, the sampling beam was raster scanned over the objective's field of view using galvanometric mirrors. This resulted in a mosaic of volumetric OCT tiles. The volumes were assembled, and a maximum intensity projection was done to recover the final images.

## Supplementary Reference

1. Lefebvre J, et al. Whole mouse brain imaging using optical coherence tomography: reconstruction, normalization, segmentation, and comparison with diffusion MRI. *Neurophotonics*. 2017;4(4):041501-041501.
