# Supplementary material for: Angiopoietin-like 2 is essential to aortic valve development in mice
Source: PubMed Central journal article supplement (PMC9681843; doi:10.1038/s42003-022-04243-6), 2022-11-21
Supplement: 42003_2022_4243_MOESM3_ESM.pdf [file 42003_2022_4243_MOESM3_ESM.pdf]

## Description of Additional Supplementary Files

**File name:** Supplementary Data 1-4

**Description:**

Supplementary Data 1: Genes significantly regulated in human adult vs. Fetal aortic valves.

Supplementary Data 2: WGCNA turquoise gene module.

Supplementary Data 3: Pathway enrichment of the WGCNA turquoise gene module.

Supplementary Data 4: Source data for main Figures.
